# Supplementary material
Source: publisher figshare collection journal article supplement (https://gsapubs.figshare.com/ndownloader/files/35180365)
Supplement: Supplementary file 1 [file 35180365]

## Sheet: 04SP-QF data table
Table S1. Summary of SHRIMP U-Pb zircon results for sample 04SP-QF. Data in bold denote analyses included in concordia calculations.
									Radiogenic Ratios						Age (Ma)
Grain.	U	Th	Th/U	Pb*	204Pb/	f206	206Pb/		207Pb/		207Pb/		206Pb/		207Pb/		%
spot	(ppm)	(ppm)		(ppm)	206Pb	%	238U	± 1s	235U		206Pb	± 1s	238U	± 1s	206Pb	± 1s	concordance
SP-66.1	2609.31	1680.1	0.64389	3302	0.00012885	0.167	1.07026	0.00408	32.6528	0.13611	0.22127	0.00028	4690.89	12.71	2989.98	2.07	156.9
SP-13.1	3076.27	3255.59	1.05829	3094	0.00032123	0.417	0.75381	0.02987	23.9041	1.22935	0.22999	0.00648	3621.53	110.76	3051.98	45.86	118.7
SP-41.1	2371.96	1197.25	0.50475	1987	0.00017737	0.23	0.72871	0.0017	22.2445	0.06492	0.22139	0.00033	3528.61	6.36	2990.86	2.38	118
SP-3.1	1437.51	793.15	0.55176	1405	0.00065124	0.845	0.68272	0.00201	19.4776	0.08541	0.20692	0.0006	3354.77	7.69	2881.55	4.73	116.4
SP-57.1	2276.82	1497.07	0.65752	1668	6.573e-05	0.085	0.61383	0.00224	18.5401	0.08263	0.21906	0.00047	3085.32	8.96	2973.79	3.45	103.8
SP-25.1	4424.91	1906.98	0.43097	3065	0.00012568	0.163	0.60359	0.00302	18.0746	0.09387	0.21718	0.0002	3044.27	12.14	2959.93	1.47	102.8
SP-51.1	3290.97	2667.73	0.81062	2428	0.00040373	0.524	0.61235	0.00235	18.9013	0.09182	0.22387	0.00057	3079.42	9.4	3008.71	4.09	102.4
SP-50.1	3166.34	2770.37	0.87494	2392	7.859e-05	0.102	0.60587	0.00208	18.5659	0.0696	0.22224	0.00025	3053.46	8.37	2997.02	1.8	101.9
SP-8.1	1071.63	733.87	0.68481	780	2.719e-05	0.035	0.59933	0.00238	18.5244	0.09251	0.22417	0.00058	3027.16	9.6	3010.87	4.13	100.5
SP-28.1	1082.4	40.93	0.03782	681	3.707e-05	0.048	0.5935	0.00195	18.3117	0.07631	0.22377	0.00049	3003.59	7.91	3008.04	3.5	99.9
SP-29.1	1531.68	1187.96	0.77559	1123	1.119e-05	0.015	0.59461	0.00199	18.3893	0.08049	0.2243	0.00054	3008.08	8.06	3011.83	3.9	99.9
SP-36.1	943.4	457.89	0.48536	656	0.00019586	0.254	0.59395	0.00256	18.4638	0.09712	0.22546	0.00057	3005.4	10.35	3020.11	4.07	99.5
SP-17.1	660.86	319.79	0.48391	453	2.767e-05	0.036	0.59151	0.0026	18.3026	0.12149	0.22441	0.001	2995.55	10.56	3012.62	7.16	99.4
SP-33.1	736.63	431.74	0.5861	515	7.821e-05	0.101	0.58921	0.00313	18.1769	0.1281	0.22374	0.0009	2986.24	12.72	3007.8	6.45	99.3
SP-42.1	1023.99	495.9	0.48428	705	2.579e-05	0.033	0.59043	0.00213	18.2788	0.09006	0.22453	0.00066	2991.14	8.64	3013.49	4.72	99.3
SP-24.1	757.82	363.04	0.47906	520	6.573e-05	0.085	0.59194	0.00414	18.4418	0.14822	0.22596	0.00072	2997.29	16.79	3023.62	5.11	99.1
SP-20.1	1041.45	613.15	0.58875	729	1.715e-05	0.022	0.58742	0.00298	18.1928	0.10251	0.22462	0.00043	2978.93	12.11	3014.13	3.06	98.8
SP-52.1	925.46	310.79	0.33583	613	1.885e-05	0.024	0.58711	0.00257	18.1979	0.09232	0.2248	0.00046	2977.68	10.46	3015.42	3.32	98.7
SP-11.1	909.19	696.58	0.76615	649	5.574e-05	0.072	0.5828	0.00351	18.0841	0.12564	0.22505	0.00063	2960.15	14.31	3017.17	4.49	98.1
SP-40.1	793.76	272.02	0.34269	515	0.00016836	0.218	0.58129	0.00356	17.963	0.12701	0.22412	0.00064	2953.99	14.51	3010.56	4.6	98.1
SP-55.1	1123.61	777.71	0.69216	794	1.674e-05	0.022	0.58035	0.00228	17.9344	0.09038	0.22413	0.0006	2950.18	9.32	3010.58	4.33	98
SP-6.1	794.81	874.27	1.09998	563	0.0012697	1.647	0.58152	0.00295	18.1184	0.13553	0.22597	0.00111	2954.96	12.04	3023.73	7.88	97.7
SP-26.1	971.71	622.2	0.64031	676	0.00018837	0.244	0.57735	0.00304	17.8781	0.11345	0.22459	0.00066	2937.93	12.45	3013.86	4.72	97.5
SP-65.1	828.31	348.4	0.42062	552	1.698e-05	0.022	0.57777	0.00301	17.9533	0.10651	0.22537	0.00051	2939.65	12.31	3019.42	3.64	97.4
SP-46.1	963.92	436.27	0.4526	644	4.173e-05	0.054	0.57766	0.00418	17.9765	0.16348	0.2257	0.00105	2939.19	17.12	3021.81	7.51	97.3
SP-21.1	2742.31	2264.21	0.82566	1918	0.00012317	0.16	0.56718	0.00255	17.2302	0.09213	0.22033	0.00053	2896.23	10.5	2983.09	3.84	97.1
SP-54.1	1029.56	479.1	0.46535	687	4.706e-05	0.061	0.57491	0.00343	17.9726	0.12071	0.22673	0.00055	2927.95	14.04	3029.11	3.92	96.7
SP-56.1	779.69	450.79	0.57817	522	0.00018147	0.235	0.56726	0.00306	17.3859	0.11869	0.22229	0.00079	2896.54	12.62	2997.35	5.72	96.6
SP-7.1	696.84	431.82	0.61969	469	0.00013331	0.173	0.57032	0.00322	17.6802	0.12163	0.22484	0.00074	2909.12	13.23	3015.67	5.29	96.5
SP-14.1	787.23	513.55	0.65235	540	0.00010035	0.13	0.56964	0.00267	17.6333	0.0964	0.22451	0.00052	2906.35	10.96	3013.3	3.7	96.5
SP-15.1	656.99	321.68	0.48963	433	8.637e-05	0.112	0.57152	0.00331	17.7886	0.12891	0.22574	0.00083	2914.08	13.6	3022.08	5.93	96.4
SP-45.1	610.14	233.55	0.38278	398	6.747e-05	0.087	0.56893	0.00364	17.633	0.13407	0.22478	0.00076	2903.42	14.99	3015.28	5.43	96.3
SP-9.1	840.58	479.39	0.57031	562	7.325e-05	0.095	0.56859	0.00421	17.6534	0.14137	0.22518	0.00051	2902.04	17.32	3018.09	3.64	96.2
SP-63.1	1324.73	1064.43	0.8035	924	0.00017016	0.221	0.56607	0.00307	17.4309	0.10718	0.22333	0.00052	2891.66	12.63	3004.87	3.72	96.2
SP-47.1	2033.66	1182.73	0.58158	1338	0.00010195	0.132	0.55783	0.0023	16.9836	0.07738	0.22081	0.00033	2857.66	9.51	2986.63	2.42	95.7
SP-43.1	1036.71	456.01	0.43986	674	4.709e-05	0.061	0.56276	0.00351	17.3762	0.12092	0.22394	0.00053	2878.04	14.51	3009.23	3.84	95.6
SP-32.1	862.65	537.53	0.62312	568	0.00025327	0.328	0.55878	0.00367	17.2401	0.14189	0.22377	0.00094	2861.6	15.21	3007.99	6.76	95.1
SP-4.1	1296.57	721.27	0.55629	863	0.00030946	0.401	0.55923	0.00278	17.3245	0.10382	0.22468	0.00063	2863.43	11.5	3014.56	4.48	95
SP-38.1	1017.6	485.65	0.47725	659	5.385e-05	0.07	0.55745	0.00193	17.2579	0.0778	0.22453	0.00056	2856.1	8.01	3013.47	3.99	94.8
SP-10.1	1076.76	755.11	0.70128	713	0.00027924	0.362	0.55361	0.00475	17.013	0.15568	0.22288	0.00051	2840.15	19.73	3001.65	3.69	94.6
SP-30.1	1011.33	469.62	0.46436	637	0.00023098	0.3	0.54775	0.00718	16.8011	0.27868	0.22246	0.00193	2815.83	29.95	2998.57	14.01	93.9
SP-49.1	3145.95	1371.18	0.43586	1953	0.00016211	0.21	0.53893	0.0015	16.1874	0.05464	0.21784	0.00035	2778.97	6.29	2964.81	2.57	93.7
SP-2.1	912.23	677.56	0.74275	617	8.219e-05	0.107	0.5508	0.0073	17.1473	0.27822	0.22579	0.00177	2828.51	30.41	3022.42	12.65	93.6
SP-62.1	876.12	365.89	0.41763	545	0.00064071	0.831	0.53688	0.00222	16.522	0.08725	0.2232	0.00063	2770.37	9.32	3003.88	4.51	92.2
SP-44.1	2911	1923.28	0.66069	1869	0.00014486	0.188	0.53447	0.00265	16.5052	0.13089	0.22397	0.00126	2760.25	11.13	3009.48	9.03	91.7
SP-27.1	762.24	385.16	0.5053	481	0.0016291	2.113	0.527	0.00394	16.0162	0.15095	0.22042	0.00108	2728.79	16.63	2983.76	7.9	91.5
SP-22.1	5224.97	4751.88	0.90946	3450	0.00084473	1.095	0.52333	0.00291	15.7558	0.10806	0.21835	0.00074	2713.3	12.33	2968.59	5.45	91.4
SP-19.1	695.38	504.84	0.726	436	0.00029701	0.385	0.53172	0.00234	16.4956	0.12528	0.225	0.00128	2748.71	9.84	3016.81	9.13	91.1
SP-16.1	661.5	441.62	0.66761	419	3.715e-05	0.048	0.52907	0.00278	16.3736	0.11311	0.22445	0.00087	2737.55	11.73	3012.91	6.24	90.9
SP-34.1	592.09	518.99	0.87654	385	0.00084571	1.097	0.53028	0.01193	16.5044	0.39027	0.22573	0.00113	2742.62	50.45	3022.04	8.03	90.8
SP-18.1	1230.95	623.88	0.50683	739	8.763e-05	0.114	0.50996	0.00274	15.7764	0.09501	0.22437	0.00048	2656.46	11.71	3012.34	3.42	88.2
SP-39.1	2704.26	1230.56	0.45504	1508	0.00045605	0.591	0.47859	0.00392	13.9327	0.12997	0.21114	0.00075	2521.12	17.13	2914.31	5.74	86.5
SP-23.1	1780.15	1261.86	0.70885	1046	0.00013258	0.172	0.48939	0.00248	15.0618	0.08842	0.22321	0.00054	2568.03	10.73	3004.02	3.88	85.5
SP-12.1	299.35	201.17	0.67201	168	0.00041638	0.54	0.48807	0.00898	14.9816	0.35569	0.22262	0.00287	2562.34	39.01	2999.77	20.87	85.4
SP-64.1	832.35	409.29	0.49173	454	0.00026188	0.34	0.47312	0.00288	14.5121	0.1053	0.22246	0.00073	2497.23	12.6	2998.6	5.27	83.3
SP-58.1	1672.02	834.77	0.49926	844	0.00022302	0.289	0.43515	0.00233	13.1991	0.08354	0.21999	0.00061	2328.87	10.46	2980.64	4.48	78.1
SP-59.1	740.02	864.98	1.16886	381	0.00062497	0.81	0.43136	0.0093	13.3424	0.30858	0.22434	0.00137	2311.82	42.03	3012.07	9.81	76.8
SP-61.1	3041.74	2252.67	0.74059	1520	0.00018985	0.246	0.4176	0.00178	12.5229	0.07051	0.21749	0.0007	2249.58	8.08	2962.21	5.16	75.9
SP-48.1	1881.81	1426.48	0.75804	935	0.00052288	0.678	0.41602	0.00139	12.7783	0.05095	0.22277	0.0004	2242.4	6.32	3000.81	2.9	74.7
SP-53.1	2195.31	920.08	0.41911	1019	0.00036294	0.471	0.40092	0.00201	12.1763	0.06904	0.22027	0.00046	2173.3	9.26	2982.66	3.37	72.9
SP-5.1	2057.51	1115.88	0.54235	964	6.65e-06	0.009	0.39657	0.00465	12.1898	0.17641	0.22293	0.00159	2153.22	21.5	3002	11.53	71.7
SP-37.1	6690.97	6215.25	0.9289	3127	0.00024242	0.314	0.37636	0.00167	10.9339	0.08002	0.2107	0.00112	2059.28	7.83	2910.94	8.6	70.7
SP-35.1	3929.58	4530.98	1.15304	1988	0.0021143	2.742	0.38214	0.00188	11.5378	0.08789	0.21898	0.00114	2086.27	8.8	2973.19	8.44	70.2
SP-31.1	2499.9	1719.93	0.688	1047	0.00089368	1.159	0.34448	0.00207	10.036	0.08208	0.2113	0.00103	1908.21	9.92	2915.51	7.88	65.5
SP-1.1	1644.35	1244.8	0.75702	473	0.00020677	0.268	0.23799	0.00129	7.1736	0.05281	0.21862	0.00095	1376.22	6.74	2970.54	6.99	46.3
SP-60.1	3369.79	2321.23	0.68884	772	0.0013276	1.722	0.18641	0.00104	5.29875	0.05117	0.20616	0.00149	1101.92	5.65	2875.56	11.77	38.3
